# Supplementary material
Source: PubMed Central journal article supplement (PMC6123655)

## Appendix Figures

Table of contents –

### Appendix Figure S1

Cavin1 undecad sequences from species used in bio-informatic analysis

### Appendix Figure S2

Raw SDS-PAGE gels related to Figure 4B

### Appendix Figure S3

Raw SDS-PAGE gels related to Figure 5C

Appendix Figure S1

Cavin1 undecad sequences from species used in bio-informatic analysis

| Derived from Uniprot | Species                       | Protein | Undecad repeat number | Amino acid residue |              |             |             |             |             |
|----------------------|-------------------------------|---------|-----------------------|--------------------|--------------|-------------|-------------|-------------|-------------|
|                      |                               |         |                       | Repeat 1           | Repeat 2     | Repeat 3    | Repeat 4    | Repeat 5    | Repeat 6    |
| Actinopterygii       | Spotted gar                   | Cavin1  | 2                     | MEKTRQKTRDN        | LEKTRQKTKEN  |             |             |             |             |
|                      | Great blue spotted mudskipper | Cavin1b | 6                     | MDKTRAKTKEN        | LEKTKQKTKDN  | IEKTKQKTKEN | IEKTKQKTKEN | IEKTKQKTKEN | LEKTRQKTKEN |
|                      |                               | Cavin1a | 2                     | LEKTKIKTKEN        | LEKTRQKTRDN  |             |             |             |             |
|                      | Zebrafish                     | Cavin1b | 5                     | MEKTKQKTKEN        | LEKTKQKTKEN  | LEKTRMRTKEN | LEKTRQKTKEN | LEKTKQKTKEN |             |
|                      |                               | Cavin1a | 3                     | MQKTRQKTKEN        | LEKTRMRTKEN  | LEKTRQRTREN |             |             |             |
|                      | Mexican cave fish             | Cavin1b | 5                     | MEKTKQKTKDN        | LEKTKQKTKEN  | LEKTRMKTKEN | LEKTKQKTKEN | LEKTRQKTKEN |             |
|                      |                               | Cavin1a | 3                     | MEKTRQRTKEN        | LEKTRQRTKEN  | LEKTRQKTKEN |             |             |             |
|                      | Tilapia                       | Cavin1b | 1                     | MDKTRAKTKEN        | LEKTRQKT---- |             |             |             |             |
|                      |                               | Cavin1a | 3                     | IEKTKLTKEN         | LEKTKQRTREN  | LEKTRQRTDN  |             |             |             |
|                      | Medaka                        | Cavin1b | 1                     | MDRTRAKTKEN        | LEK-----     |             |             |             |             |
|                      |                               | Cavin1a | 3                     | MEKTKQKTKEN        | LEKTKKRTREN  | LEKTRQRTDN  |             |             |             |
|                      | Platyfish                     | Cavin1b | 5                     | MDKTRAKTKEN        | LEKTRQKTKEN  | IEKTKQKTKEN | LEKTRQRTKEN | IEKTKQKTKEN |             |
|                      |                               | Cavin1a | 3                     | MEKTKLTKEN         | LEKTKQRTREN  | LEKTRQKTRDN |             |             |             |
|                      | Amazon molly                  | Cavin1b | 5                     | MDKTRAKTKEN        | LEKTRQKTKEN  | IEKTKQKTKEN | LEKTRQRTKEN | IEKTKQKTKEN |             |
|                      |                               | Cavin1a | 3                     | MEKTKLTKEN         | LEKTKQRTREN  | LEKTRQKTRDN |             |             |             |
|                      | Fugu                          | Cavin1b | 2                     | MDKTRAKTKEN        | IEKTKQKTKAN  |             |             |             |             |
| Cavin1a              |                               | 3       | MEKTKTKTKEN           | YEKTKQKTKEN        | LEKTRQKTRDN  |             |             |             |             |
| Sarcopterygii        | Coelacanth                    | Cavin1  | 1                     | MEKTKQKTKEN        |              |             |             |             |             |
|                      | Tasmanian Devil               | Cavin1  | 2                     | MEKTKVRTREN        | LEKTRLTKEN   |             |             |             |             |
|                      | Koala                         | Cavin1  | 2                     | MEKTKVRTREN        | LEKTRLTKEN   |             |             |             |             |
|                      | Zebra finch                   | Cavin1  | 1                     | MEKTKLTKEN         |              |             |             |             |             |
|                      | Chicken                       | Cavin1  | 1                     | MEKTKLTKEN         |              |             |             |             |             |
|                      | Duck                          | Cavin1  | 1                     | MEKTKLTKEN         |              |             |             |             |             |
|                      | Chinese softshell turtle      | Cavin1  | 1                     | MEKTKLTKEN         |              |             |             |             |             |
|                      | Rat                           | Cavin1  | 2                     | MEKTKVRTREN        | LEKTRLTKEN   |             |             |             |             |
|                      | Chimpanzee                    | Cavin1  | 2                     | MEKTKVRTREN        | LEKTRLTKEN   |             |             |             |             |
|                      | Mouse                         | Cavin1  | 2                     | MEKTKVRTREN        | LEKTRLTKEN   |             |             |             |             |
|                      | Elephant                      | Cavin1  | 2                     | MEKTKVRTREN        | LEKTRLTKEN   |             |             |             |             |
|                      | Human                         | Cavin1  | 2                     | MEKTKVRTREN        | LEKTRLTKEN   |             |             |             |             |
|                      | Gorilla                       | Cavin1  | 2                     | MEKTKVRTREN        | LEKTRLTKEN   |             |             |             |             |
|                      | Armadillo                     | Cavin1  | 2                     | MEKTKVRTREN        | LEKTRLTKEN   |             |             |             |             |
|                      | Flying Lemur                  | Cavin1  | 2                     | MEKTRVRTREN        | LEKTRLTKEN   |             |             |             |             |
|                      | Dog                           | Cavin1  | 2                     | MEKTKVRTREN        | LEKTRLTKEN   |             |             |             |             |
|                      | Carolina anole                | Cavin1  | 2                     | MEKTKLTKEN         | LEKTKLTKEN   |             |             |             |             |
|                      | Frog                          | Cavin1  | 1                     | MEKTKVTKEN         |              |             |             |             |             |

Appendix Figure S2

Raw SDS-PAGE gels related to Figure 4B

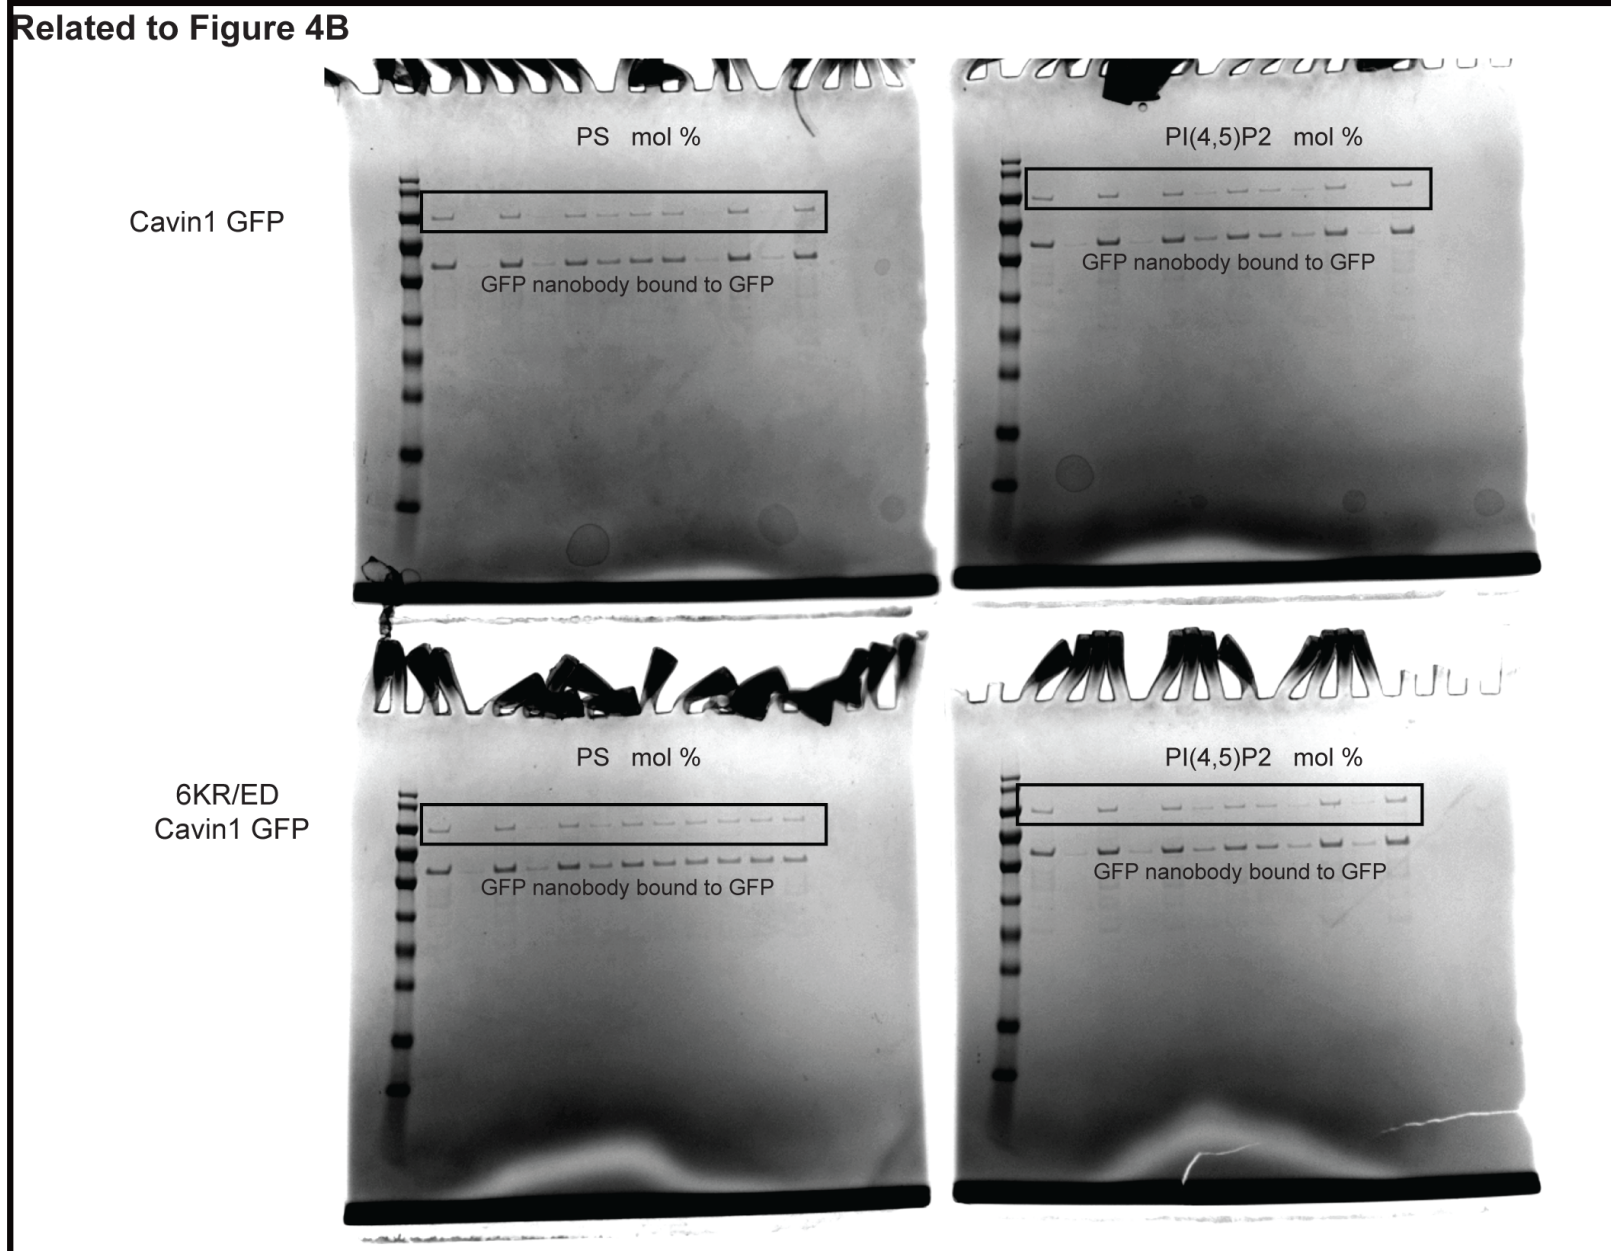

Appendix Figure S3

Raw SDS-PAGE gels related to Figure 5C

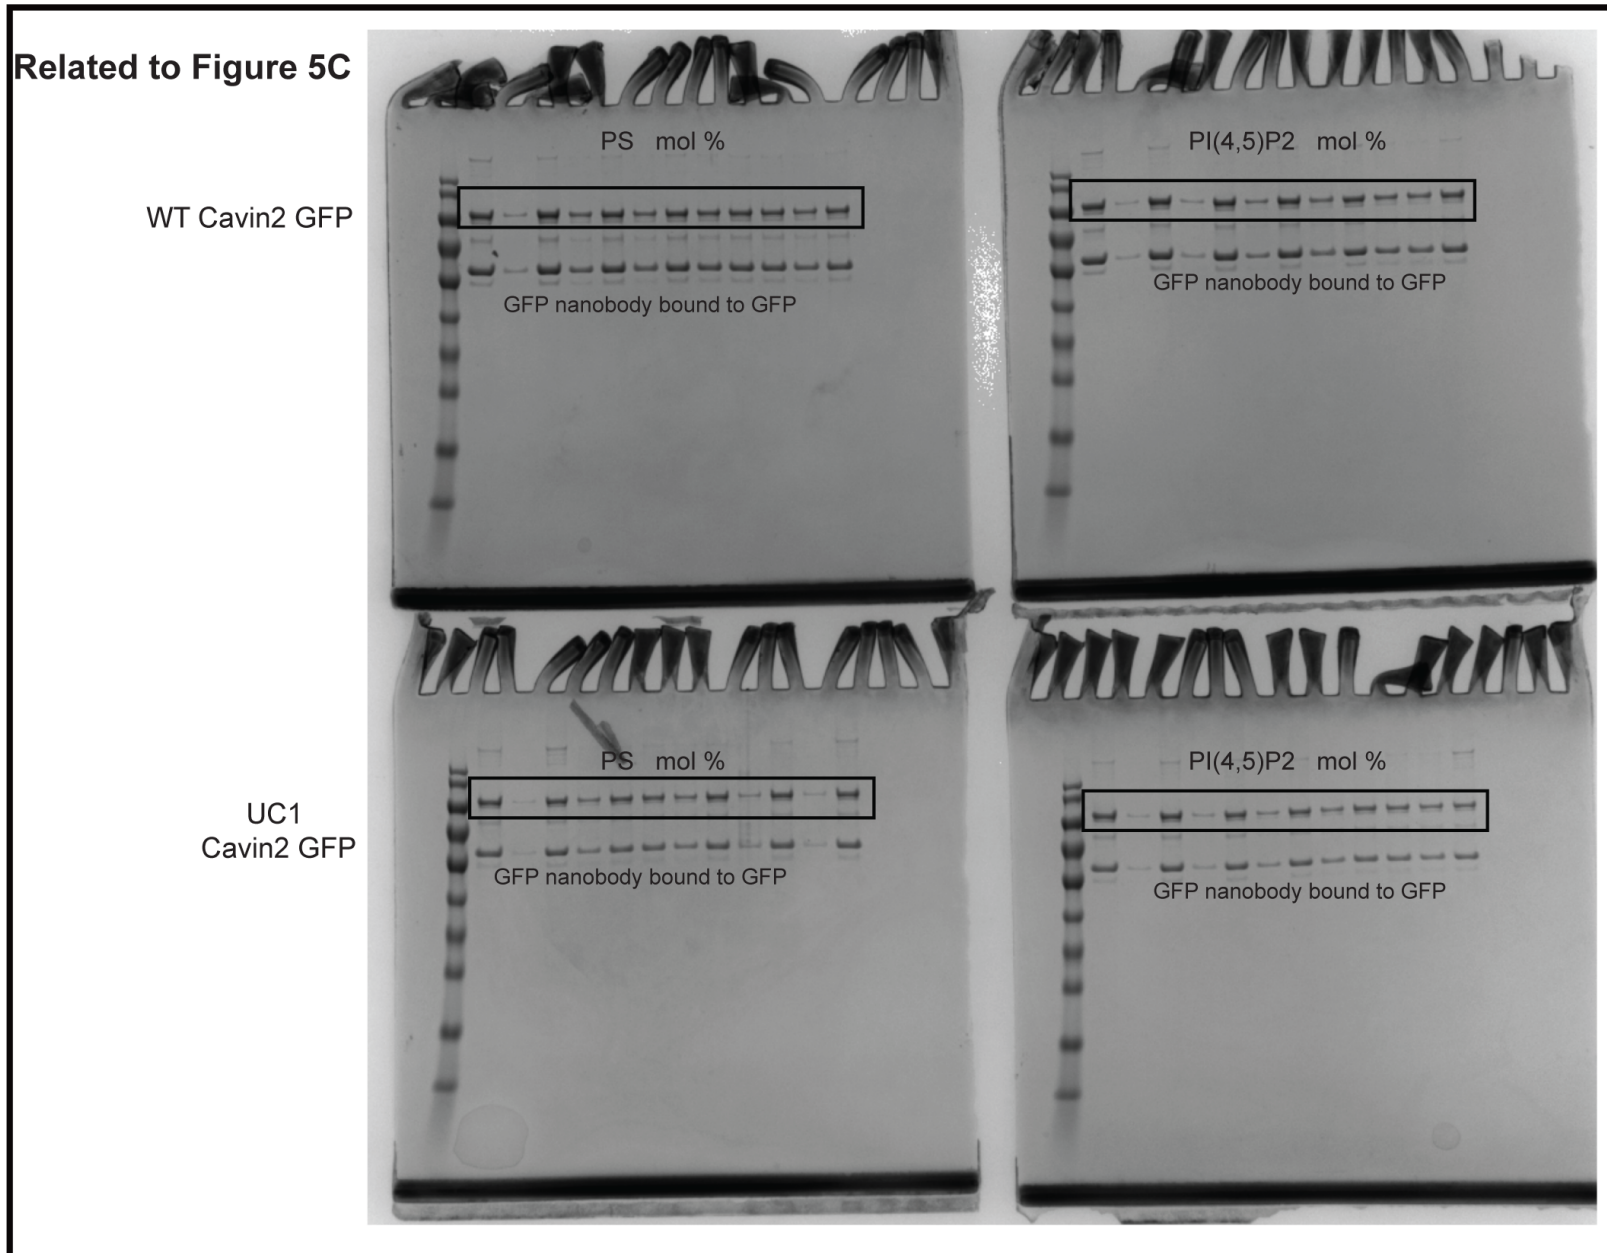

Supplement: EMBR-19-e45775-s001.pdf [file EMBR-19-e45775-s001.pdf]
